# Supplementary material for: The Expression Patterns and Implications of MALAT1, MANCR, PSMA3-AS1 and miR-101 in Esophageal Adenocarcinoma
Source: MDPI journal article supplement (doi:10.3390/ijms25010098), 2023-12-20

Supplemental Table S1: Primers used in this study

| Molecule names   | Sequences (5' to 3')                                        |
|------------------|-------------------------------------------------------------|
| <i>MALAT1</i>    | F-GAATTGCGTCATTTAAAGCCTAGTT<br>R-GTTTCATCCTACCACTCCCAATTAAT |
| <i>MANCR</i>     | F-TCCACTCACCCTCGCTCAC<br>R-CAGGATTAGCACGTTCCAGG             |
| <i>PSMA3-AS1</i> | F-AACAGACCATCAGAAGAGAACA<br>R-GAACAGAAACCAGAGCCATACA        |
| <i>MiR-101</i>   | F-GAGGGGTACAGTACTGTGATA<br>R-TGCGTGTCGTGGAGTC               |

Supplementary Figure S1: Expression of MALAT1 in relation to grouped T-stage. ns: not significant

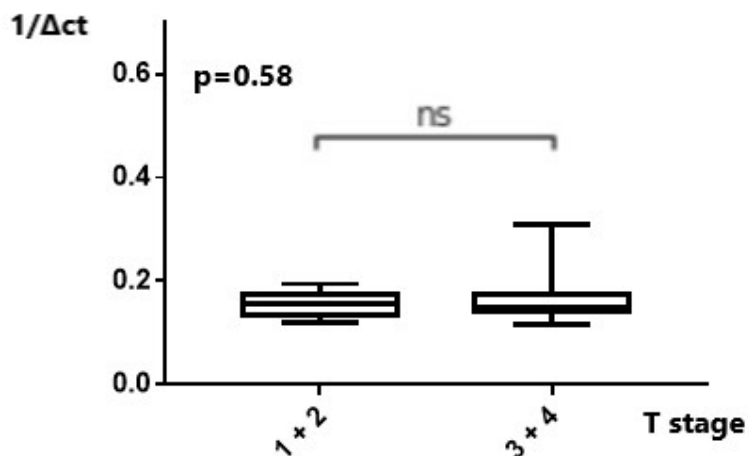

Supplementary Figure S2: Expression of MANCR in relation to grouped T-stage. ns: not significant

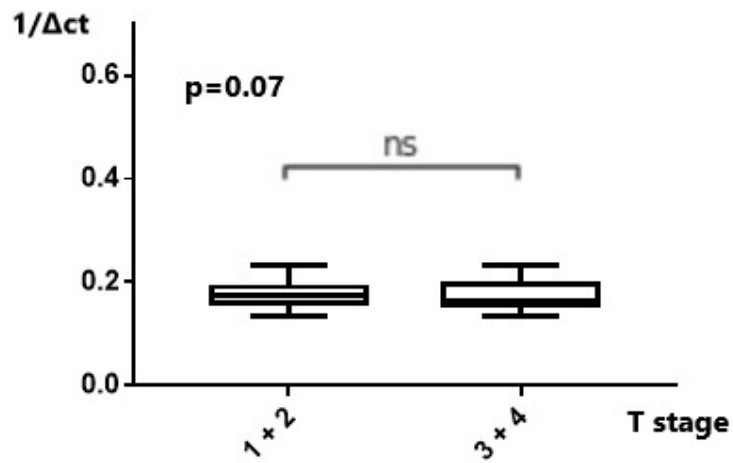

Supplementary Figure S3: Expression of PSMA3-AS1 in relation to grouped T-stage. ns: not significant

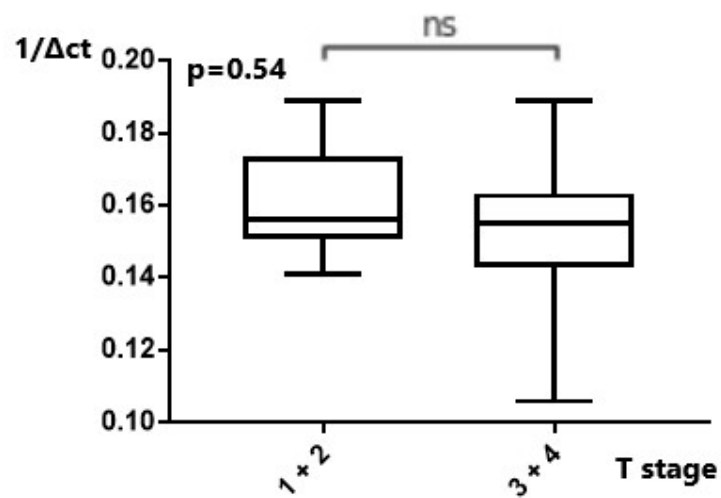

Supplementary Figure S4: Expression of PSMA3-AS1 in relation to N stage. ns: not significant

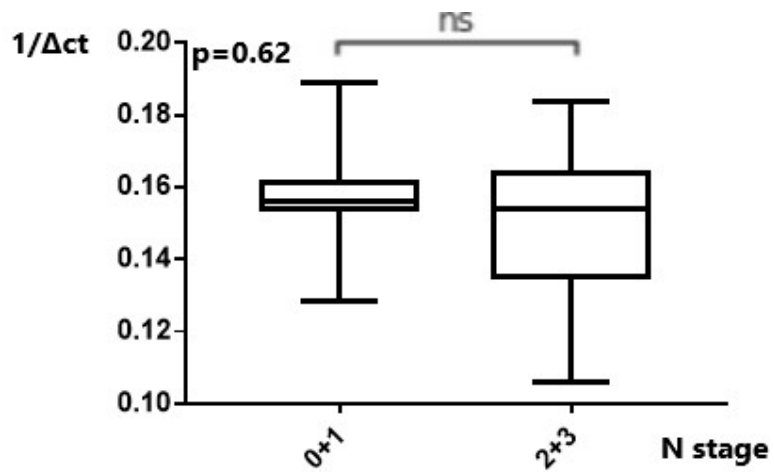

Supplementary Figure S5: Expression of miR-101 in relation to N stage. ns: not significant

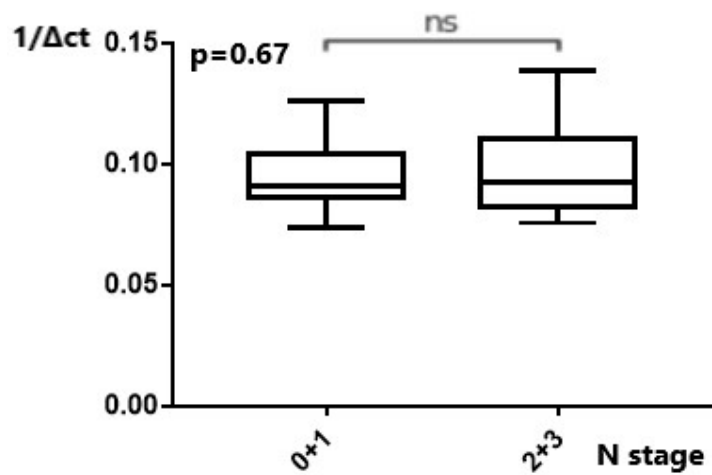

Supplementary Figure S6: Expression of miR-101 in relation to the size of the tumor. ns: not significant

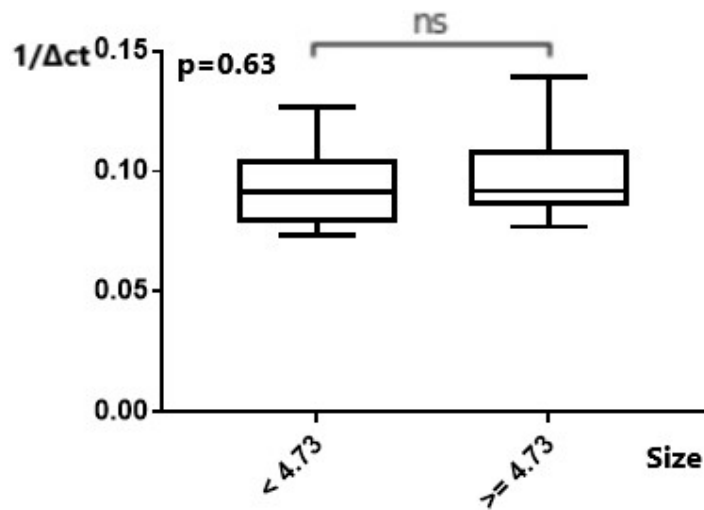

Supplementary Figure S7: Expression of MALAT1 in relation to the size of the tumor. ns: not significant

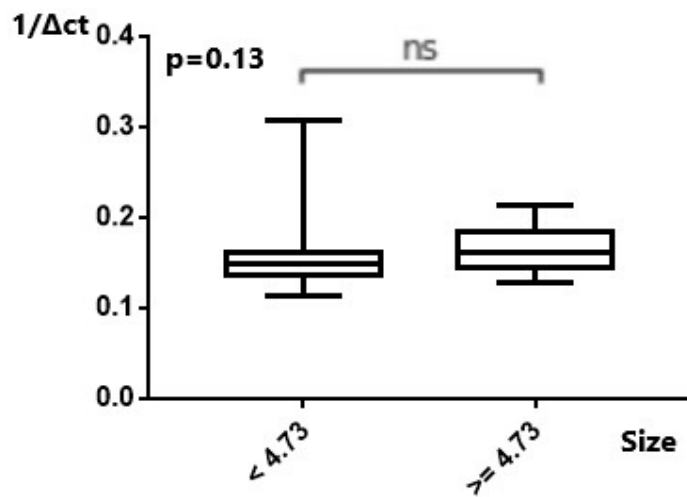

Supplementary Figure S8: Expression of MALAT1 in relation to the grade of the tumor. ns: not significant

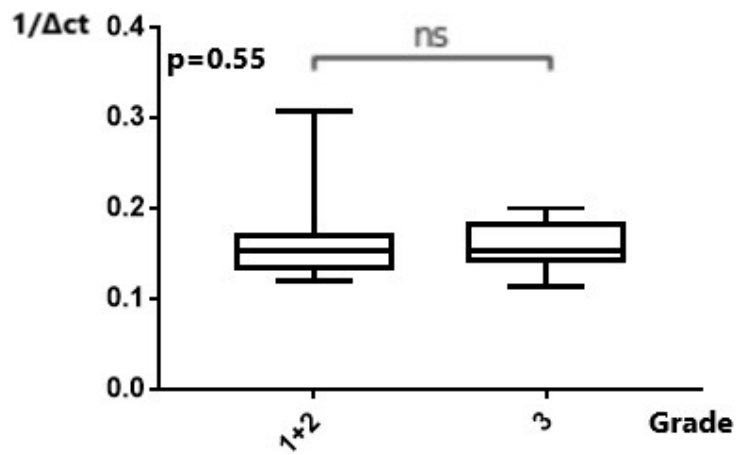

Supplementary Figure S9: Expression of MANCR in relation to grade. ns: not significant

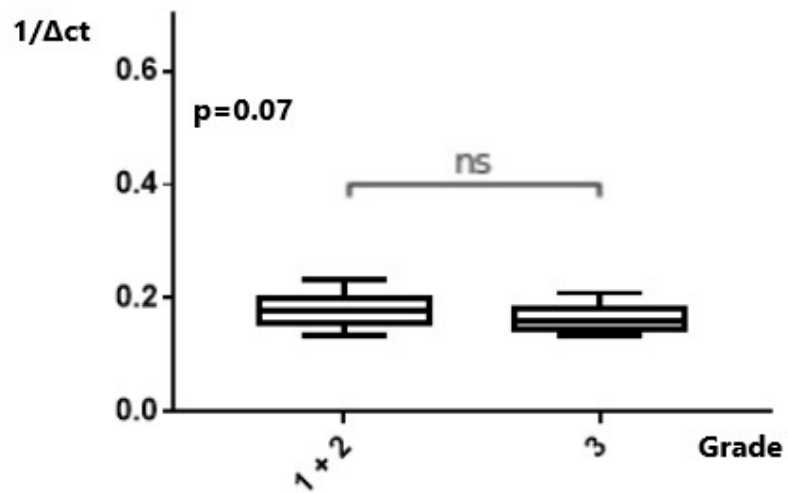

Supplementary Figure S10: Expression of PSMA3-AS1 in relation to grade. ns: not significant

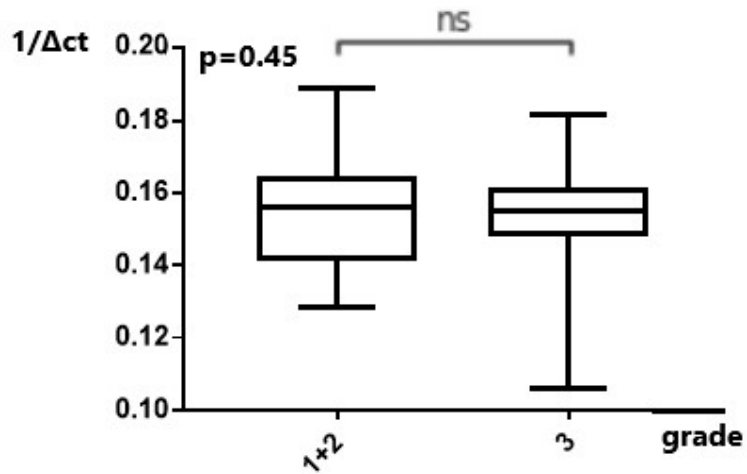

Supplementary Figure S11: MALAT1, overall survival (continuous line: high-MALAT1 expression, intermittent line: low-MALAT1 expression).

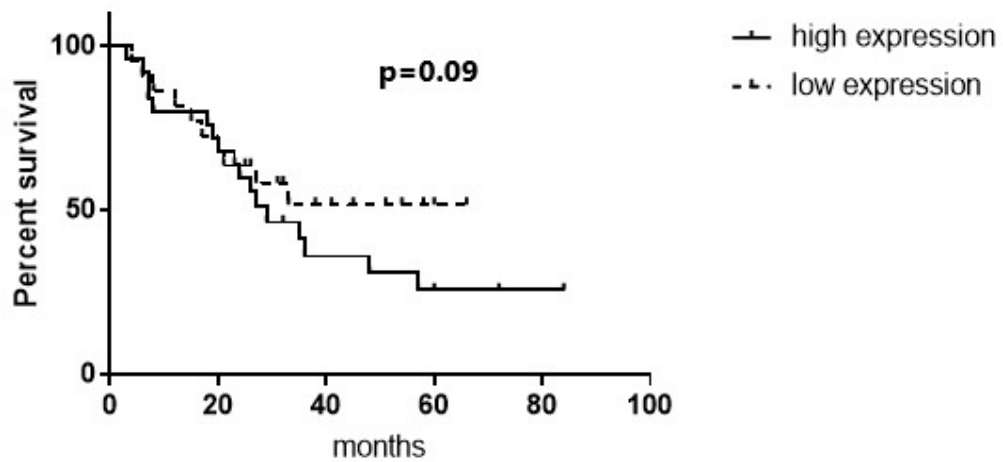

Supplementary Figure S12: MiR-101, overall survival in negative lymph-node patients (continuous line: high-miR-101 expression, intermittent line: low-miR-101 expression).

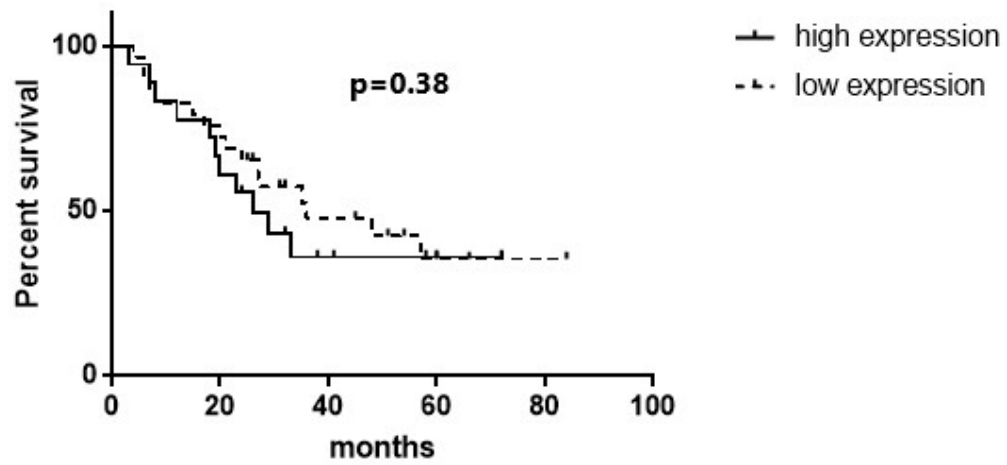

Supplementary Figure S13: MANCR, disease-free survival (continuous line: high-MANCR expression, intermittent line: low-MANCR expression).

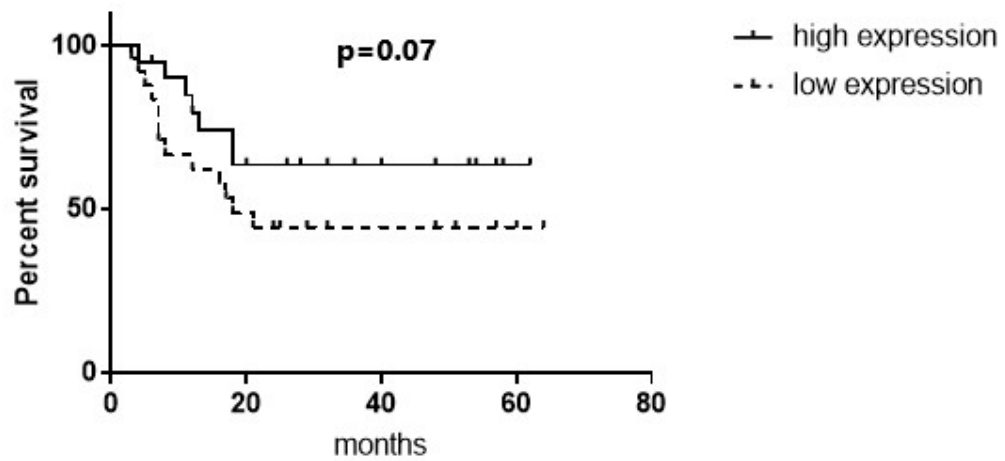

Supplement: s1 [file s1]
